# Supplementary material for: Artificial soils from alluvial tin mining wastes in Malaysia – A study of soil chemistry following experimental treatments and the impact of mycorrhizal treatment on growth and foliar chemistry
Source: Royal Society of Chemistry journal article supplement (doi:10.1039/c1em10578g), 2011-12-02
Supplement: c1em10578g.pdf [file c1em10578g.pdf]

## Electronic Supplementary Information

### Table S3.

Key to subsequent data tables:

Data for Rudua (sandy), Rengam (kaolinitic) and artificial soils containing various proportions of sand and peat (% by weight) are tabulated along with data for equivalent soils dosed with mycorrhizal carrier medium. Data within columns (for separate mycorrhizal treatments) followed by different alphabetic superscripts and data within rows (for separate mycorrhizal treatments) followed by different numerical superscripts are significantly different at  $p \leq 0.05$ . Comparisons between non-mycorrhizal and mycorrhizal carrier treatments are also included (\*denotes a significant difference at  $p \leq 0.05$ ).

**Table S3a**

|          |     | pH     | Non-mycorrhizal<br>Peat (%)            |                           |                             |                           |
|----------|-----|--------|----------------------------------------|---------------------------|-----------------------------|---------------------------|
|          |     |        | 0                                      | 2                         | 4                           | 6                         |
| Sand (%) | 100 |        | 4.05(0.02) <sup>a,1</sup>              | 4.10(0.01) <sup>c,2</sup> | 4.04(0.02) <sup>d,2</sup>   | 3.87(0.05) <sup>c,2</sup> |
|          | 90  |        | 3.81(0.01) <sup>d,1</sup>              | 3.70(0.01) <sup>b,2</sup> | 3.63(0.05) <sup>c,3</sup>   | 3.51(0.01) <sup>b,4</sup> |
|          | 80  |        | 3.68(0.01) <sup>c,1</sup>              | 3.56(0.01) <sup>a,2</sup> | 3.53(0.04) <sup>b,2,3</sup> | 3.50(0.01) <sup>b,3</sup> |
|          | 70  |        | 3.73(0.01) <sup>b,1</sup>              | 3.56(0.01) <sup>a,2</sup> | 3.38(0.01) <sup>a,3</sup>   | 3.39(0.01) <sup>a,3</sup> |
|          |     | Rudua  | 4.63(0.00) <sup>f</sup>                |                           |                             |                           |
|          |     | Rengam | 4.61(0.01) <sup>e</sup>                |                           |                             |                           |
|          |     |        | Mycorrhizal carrier medium<br>Peat (%) |                           |                             |                           |
|          |     |        | 0                                      | 2                         | 4                           | 6                         |
| Sand (%) | 100 |        | 6.19(0.01) <sup>d,1</sup>              | 6.38(0.01) <sup>c,2</sup> | 6.00(0.01) <sup>d,2</sup>   | 5.68(0.01) <sup>d,4</sup> |
|          | 90  |        | 4.93(0.01) <sup>c,1</sup>              | 5.48(0.02) <sup>b,2</sup> | 6.42(0.01) <sup>c,3</sup>   | 5.84(0.01) <sup>c,4</sup> |
|          | 80  |        | 6.12(0.01) <sup>b,1</sup>              | 5.73(0.02) <sup>a,2</sup> | 6.17(0.00) <sup>b,3</sup>   | 6.11(0.01) <sup>b,1</sup> |
|          | 70  |        | 5.24(0.00) <sup>a,1,3</sup>            | 5.73(0.00) <sup>a,2</sup> | 5.23(0.01) <sup>a,3</sup>   | 5.39(0.01) <sup>a,4</sup> |
|          |     |        | Comparisons<br>Peat (%)                |                           |                             |                           |
|          |     |        | 0                                      | 2                         | 4                           | 6                         |
| Sand (%) | 100 |        | *                                      | *                         | *                           | *                         |
|          | 90  |        | *                                      | *                         | *                           | *                         |
|          | 80  |        | *                                      | *                         | *                           | *                         |
|          | 70  |        | *                                      | *                         | *                           | *                         |

**Table S3b**

|          |        | Carbon                                    |                           | Non-mycorrhizal<br>Peat (%) |                           |  |  |
|----------|--------|-------------------------------------------|---------------------------|-----------------------------|---------------------------|--|--|
|          |        | 0                                         | 2                         | 4                           | 6                         |  |  |
| Sand (%) | 100    | 0.06(0.01) <sup>a,1</sup>                 | 0.40(0.02) <sup>d,2</sup> | 0.98(0.02) <sup>d,3</sup>   | 1.82(0.03) <sup>d,4</sup> |  |  |
|          | 90     | 0.20(0.01) <sup>d,1</sup>                 | 0.87(0.01) <sup>c,2</sup> | 1.61(0.03) <sup>c,3</sup>   | 1.96(0.03) <sup>c,4</sup> |  |  |
|          | 80     | 0.30(0.02) <sup>c,1</sup>                 | 1.04(0.03) <sup>b,2</sup> | 1.92(0.04) <sup>b,3</sup>   | 2.92(0.61) <sup>b,4</sup> |  |  |
|          | 70     | 0.34(0.01) <sup>b,1</sup>                 | 1.24(0.02) <sup>a,2</sup> | 2.15(0.02) <sup>a,3</sup>   | 3.24(0.02) <sup>a,4</sup> |  |  |
|          | Rudua  | 0.28(0.01) <sup>c</sup>                   |                           |                             |                           |  |  |
|          | Rengam | 0.42(0.03) <sup>e</sup>                   |                           |                             |                           |  |  |
|          |        | Mycorrhizal carrier<br>medium<br>Peat (%) |                           |                             |                           |  |  |
|          |        | 0                                         | 2                         | 4                           | 6                         |  |  |
| Sand (%) | 100    | 0.14(0.01) <sup>c,1</sup>                 | 0.45(0.01) <sup>d,2</sup> | 1.18(0.03) <sup>c,3</sup>   | 1.35(0.03) <sup>d,4</sup> |  |  |
|          | 90     | 0.25(0.01) <sup>b,1</sup>                 | 0.99(0.02) <sup>c,2</sup> | 1.53(0.03) <sup>b,3</sup>   | 1.91(0.07) <sup>c,4</sup> |  |  |
|          | 80     | 0.49(0.06) <sup>a,1</sup>                 | 1.21(0.01) <sup>b,2</sup> | 1.91(0.12) <sup>a,3</sup>   | 2.67(0.06) <sup>b,4</sup> |  |  |
|          | 70     | 0.47(0.03) <sup>a,1</sup>                 | 1.07(0.03) <sup>a,2</sup> | 2.04(0.05) <sup>a,3</sup>   | 2.90(0.05) <sup>a,4</sup> |  |  |
|          |        |                                           |                           |                             |                           |  |  |
|          |        | Comparisons<br>Peat (%)                   |                           |                             |                           |  |  |
|          |        | 0                                         | 2                         | 4                           | 6                         |  |  |
| Sand (%) | 100    | *                                         | *                         | *                           | *                         |  |  |
|          | 90     | *                                         | *                         | *                           | NS                        |  |  |
|          | 80     | *                                         | *                         | NS                          | *                         |  |  |
|          | 70     | *                                         | *                         | *                           | *                         |  |  |
|          |        |                                           |                           |                             |                           |  |  |

**Table S3c**

|          |        | Nitrogen                                  |                           | Non-mycorrhizal<br>Peat (%) |                             |                           |   |
|----------|--------|-------------------------------------------|---------------------------|-----------------------------|-----------------------------|---------------------------|---|
|          |        |                                           |                           | 0                           | 2                           | 4                         | 6 |
| Sand (%) | 100    | 0.00(0.00) <sup>1</sup>                   | 0.00(0.00) <sup>c,1</sup> | 0.00(0.00) <sup>c,1</sup>   | 0.00(0.00) <sup>c,1</sup>   | 0.44(0.02) <sup>c,2</sup> |   |
|          | 90     | 0.00(0.00) <sup>1</sup>                   | 0.00(0.00) <sup>c,1</sup> | 0.23(0.03) <sup>b,2</sup>   | 0.30(0.06) <sup>a,b,2</sup> |                           |   |
|          | 80     | 0.00(0.00) <sup>1</sup>                   | 0.27(0.04) <sup>b,2</sup> | 0.13(0.02) <sup>a,3</sup>   | 0.39(0.03) <sup>b,c,4</sup> |                           |   |
|          | 70     | 0.00(0.00) <sup>1</sup>                   | 0.34(0.02) <sup>a,2</sup> | 0.15(0.03) <sup>a,3</sup>   | 0.27(0.03) <sup>a,4</sup>   |                           |   |
|          | Rudua  | 0.00 (0.00)                               |                           |                             |                             |                           |   |
|          | Rengam | 0.00 (0.00)                               |                           |                             |                             |                           |   |
|          |        | Mycorrhizal carrier<br>medium<br>Peat (%) |                           |                             |                             |                           |   |
|          |        |                                           |                           | 0                           | 2                           | 4                         | 6 |
| Sand (%) | 100    | 0.00(0.00) <sup>1</sup>                   | 0.00(0.00) <sup>b,1</sup> | 0.00(0.00) <sup>c,1</sup>   | 0.43(0.05) <sup>b,2</sup>   |                           |   |
|          | 90     | 0.00(0.00) <sup>1</sup>                   | 0.00(0.00) <sup>b,1</sup> | 0.27(0.05) <sup>a,2</sup>   | 0.29(0.01) <sup>a,2</sup>   |                           |   |
|          | 80     | 0.00(0.00) <sup>1</sup>                   | 0.26(0.01) <sup>a,2</sup> | 0.47(0.01) <sup>b,3</sup>   | 0.46(0.03) <sup>b,3</sup>   |                           |   |
|          | 70     | 0.00(0.00) <sup>1</sup>                   | 0.26(0.01) <sup>a,2</sup> | 0.23(0.04) <sup>a,2</sup>   | 0.33(0.02) <sup>a,3</sup>   |                           |   |
|          |        | Comparisons<br>Peat (%)                   |                           |                             |                             |                           |   |
|          |        |                                           |                           | 0                           | 2                           | 4                         | 6 |
| Sand (%) | 100    | -                                         | -                         | -                           | NS                          |                           |   |
|          | 90     | -                                         | -                         | NS                          | NS                          |                           |   |
|          | 80     | -                                         | NS                        | *                           | NS                          |                           |   |
|          | 70     | -                                         | *                         | NS                          | *                           |                           |   |

**Table S3d**

| <b>P</b>        |        | <b>Non-mycorrhizal<br/>Peat (%)</b>            |                               |                               |                               |
|-----------------|--------|------------------------------------------------|-------------------------------|-------------------------------|-------------------------------|
|                 |        | <b>0</b>                                       | <b>2</b>                      | <b>4</b>                      | <b>6</b>                      |
| <b>Sand (%)</b> | 100    | 0.601(0.053) <sup>a,1</sup>                    | 0.393(0.039) <sup>c,2,3</sup> | 0.358(0.026) <sup>c,2</sup>   | 0.486(0.051) <sup>c,3</sup>   |
|                 | 90     | 1.10 (0.039) <sup>a,1</sup>                    | 0.966 (0.049) <sup>b,2</sup>  | 0.833(0.031) <sup>b,3</sup>   | 0.737(0.051) <sup>b,3</sup>   |
|                 | 80     | 1.35 (0.182) <sup>a,1</sup>                    | 0.939 (0.052) <sup>b,2</sup>  | 0.881(0.078) <sup>b,2</sup>   | 0.820(0.022) <sup>b,2</sup>   |
|                 | 70     | 1.35 (0.023) <sup>a,1</sup>                    | 1.86 (0.048) <sup>a,2</sup>   | 1.41 (0.074) <sup>a,1</sup>   | 1.35 (0.039) <sup>a,1</sup>   |
|                 | Rudua  | 0.763 (0.009) <sup>a</sup>                     |                               |                               |                               |
|                 | Rengam | 14.0 (1.75) <sup>b</sup>                       |                               |                               |                               |
|                 |        | <b>Mycorrhizal carrier medium<br/>Peat (%)</b> |                               |                               |                               |
|                 |        | <b>0</b>                                       | <b>2</b>                      | <b>4</b>                      | <b>6</b>                      |
| <b>Sand (%)</b> | 100    | 0.533(0.007) <sup>c,1,2</sup>                  | 0.472 (0.021) <sup>d,1</sup>  | 0.553(0.015) <sup>d,2</sup>   | 0.509(0.050) <sup>b,1,2</sup> |
|                 | 90     | 0.839 (0.044) <sup>b,1</sup>                   | 0.654(0.030) <sup>c,1,2</sup> | 0.695(0.018) <sup>c,1,2</sup> | 0.471 (0.161) <sup>b,2</sup>  |
|                 | 80     | 0.751 (0.038) <sup>b,1</sup>                   | 0.797 (0.026) <sup>b,1</sup>  | 0.774 (0.013) <sup>b,1</sup>  | 0.651 (0.019) <sup>b,2</sup>  |
|                 | 70     | 1.37 (0.098) <sup>b,1</sup>                    | 1.28 (0.048) <sup>a,1</sup>   | 1.07 (0.036) <sup>a,2</sup>   | 0.975 (0.035) <sup>a,2</sup>  |
|                 |        | <b>Comparisons<br/>Peat (%)</b>                |                               |                               |                               |
|                 |        | <b>0</b>                                       | <b>2</b>                      | <b>4</b>                      | <b>6</b>                      |
| <b>Sand (%)</b> | 100    | NS                                             | *                             | *                             | NS                            |
|                 | 90     | *                                              | *                             | *                             | NS                            |
|                 | 80     | *                                              | *                             | NS                            | *                             |
|                 | 70     | NS                                             | *                             | *                             | *                             |

**Table S3e**

|          |        | K                            | Non-mycorrhizal<br>Peat (%)            |                            |                            |   |
|----------|--------|------------------------------|----------------------------------------|----------------------------|----------------------------|---|
|          |        |                              | 0                                      | 2                          | 4                          | 6 |
| Sand (%) | 100    | 12.4(0.321) <sup>a,1</sup>   | 7.91(0.431) <sup>d,2</sup>             | 5.60(0.529) <sup>d,3</sup> | 9.90(0.615) <sup>d,4</sup> |   |
|          | 90     | 21.9 (1.08) <sup>d,1</sup>   | 18.6(0.451) <sup>c,2</sup>             | 21.7(0.476) <sup>c,1</sup> | 21.6(0.036) <sup>c,1</sup> |   |
|          | 80     | 33.5(0.337) <sup>c,1,2</sup> | 32.7(0.114) <sup>b,1</sup>             | 34.0(0.671) <sup>b,2</sup> | 28.2(0.131) <sup>b,3</sup> |   |
|          | 70     | 73.3 (1.83) <sup>b,1</sup>   | 49.6(0.855) <sup>a,2</sup>             | 60.1 (1.57) <sup>a,3</sup> | 73.7 (1.19) <sup>a,1</sup> |   |
|          | Rudua  | 0.052 (0.091) <sup>e</sup>   |                                        |                            |                            |   |
|          | Rengam | 10.2 (0.304) <sup>a</sup>    |                                        |                            |                            |   |
|          |        |                              | Mycorrhizal carrier medium<br>Peat (%) |                            |                            |   |
|          |        |                              | 0                                      | 2                          | 4                          | 6 |
| Sand (%) | 100    | 203 (18.1) <sup>c,1</sup>    | 294 (12.3) <sup>c,2</sup>              | 517 (12.6) <sup>b,3</sup>  | 418 (2.21) <sup>b,4</sup>  |   |
|          | 90     | 120 (4.02) <sup>b,1</sup>    | 466 (15.5) <sup>a,2</sup>              | 389 (13.1) <sup>c,3</sup>  | 570 (28.0) <sup>c,4</sup>  |   |
|          | 80     | 303 (7.02) <sup>a,1</sup>    | 589 (20.5) <sup>b,2</sup>              | 503 (12.5) <sup>b,3</sup>  | 400 (13.0) <sup>b,4</sup>  |   |
|          | 70     | 587 (5.63) <sup>a,1</sup>    | 480 (5.49) <sup>a,2</sup>              | 595 (28.3) <sup>a,3</sup>  | 776 (36.1) <sup>a,4</sup>  |   |
|          |        |                              | Comparisons<br>Peat (%)                |                            |                            |   |
|          |        |                              | 0                                      | 2                          | 4                          | 6 |
| Sand (%) | 100    | *                            | *                                      | *                          | *                          |   |
|          | 90     | *                            | *                                      | *                          | *                          |   |
|          | 80     | *                            | *                                      | *                          | *                          |   |
|          | 70     | *                            | *                                      | *                          | *                          |   |

**Table S3f**

| <b>S</b>        |        | <b>Non-mycorrhizal</b>            |                            |                           |                           |
|-----------------|--------|-----------------------------------|----------------------------|---------------------------|---------------------------|
|                 |        | <b>Peat (%)</b>                   |                            |                           |                           |
|                 |        | <b>0</b>                          | <b>2</b>                   | <b>4</b>                  | <b>6</b>                  |
| <b>Sand (%)</b> | 100    | 47.0(1.89) <sup>a,1,2</sup>       | 43.3(4.57) <sup>c,1</sup>  | 39.2(2.39) <sup>d,1</sup> | 55.7(5.86) <sup>d,2</sup> |
|                 | 90     | 126 (1.10) <sup>d,1</sup>         | 131(8.82) <sup>b,1</sup>   | 166 (8.27) <sup>c,2</sup> | 166 (12.5) <sup>c,2</sup> |
|                 | 80     | 202 (2.60) <sup>c,1</sup>         | 239(4.95) <sup>a,2</sup>   | 320 (5.53) <sup>b,3</sup> | 252 (8.29) <sup>b,2</sup> |
|                 | 70     | 257 (1.86) <sup>b,1</sup>         | 234(7.32) <sup>a,2</sup>   | 257 (12.4) <sup>a,1</sup> | 324 (7.91) <sup>a,3</sup> |
|                 | Rudua  | 4.19 (0.89) <sup>f</sup>          |                            |                           |                           |
|                 | Rengam | 58.5 (1.67) <sup>e</sup>          |                            |                           |                           |
|                 |        | <b>Mycorrhizal carrier medium</b> |                            |                           |                           |
|                 |        | <b>Peat (%)</b>                   |                            |                           |                           |
|                 |        | <b>0</b>                          | <b>2</b>                   | <b>4</b>                  | <b>6</b>                  |
| <b>Sand (%)</b> | 100    | 35.2 (3.63) <sup>d,1</sup>        | 67.3(3.54) <sup>c,2</sup>  | 96.1(7.84) <sup>b,3</sup> | 73.6(1.22) <sup>d,2</sup> |
|                 | 90     | 185 (8.74) <sup>c,1</sup>         | 143(10.5) <sup>b,2</sup>   | 133 (5.63) <sup>b,2</sup> | 164 (3.20) <sup>c,3</sup> |
|                 | 80     | 168 (1.05) <sup>b,1</sup>         | 309(15.0) <sup>a,2</sup>   | 305 (16.1) <sup>a,2</sup> | 252 (17.8) <sup>b,3</sup> |
|                 | 70     | 234 (8.03) <sup>a,1</sup>         | 397(13.4) <sup>a,1,2</sup> | 367 (46.7) <sup>a,2</sup> | 470 (28.9) <sup>a,3</sup> |
|                 |        | <b>Comparisons</b>                |                            |                           |                           |
|                 |        | <b>Peat (%)</b>                   |                            |                           |                           |
|                 |        | <b>0</b>                          | <b>2</b>                   | <b>4</b>                  | <b>6</b>                  |
| <b>Sand (%)</b> | 100    | *                                 | *                          | *                         | *                         |
|                 | 90     | *                                 | NS                         | *                         | NS                        |
|                 | 80     | *                                 | *                          | NS                        | NS                        |
|                 | 70     | *                                 | *                          | *                         | *                         |

**Table S3g**

|                 |        | <b>Magnesium</b> |                             | <b>Non-mycorrhizal<br/>Peat (%)</b>            |                             |                            |  |
|-----------------|--------|------------------|-----------------------------|------------------------------------------------|-----------------------------|----------------------------|--|
|                 |        |                  | 0                           | 2                                              | 4                           | 6                          |  |
| <b>Sand (%)</b> | 100    |                  | 0.446(0.040) <sup>a,1</sup> | 3.79(0.220) <sup>d,2</sup>                     | 8.51(0.463) <sup>d,3</sup>  | 16.2(0.870) <sup>d,4</sup> |  |
|                 | 90     |                  | 12.4 (0.347) <sup>d,1</sup> | 17.8(0.563) <sup>c,2</sup>                     | 30.0(0.677) <sup>c,3</sup>  | 36.8(0.792) <sup>c,4</sup> |  |
|                 | 80     |                  | 25.8 (0.582) <sup>c,1</sup> | 36.4(0.721) <sup>b,2</sup>                     | 51.0 (0.445) <sup>b,3</sup> | 47.7(0.794) <sup>b,4</sup> |  |
|                 | 70     |                  | 27.8 (0.219) <sup>b,1</sup> | 31.8 (1.23) <sup>a,2</sup>                     | 38.8 (1.23) <sup>a,3</sup>  | 54.8(0.990) <sup>a,4</sup> |  |
|                 | Rudua  |                  | 1.71 (0.035) <sup>f</sup>   |                                                |                             |                            |  |
|                 | Rengam |                  | 6.50 (0.093) <sup>c</sup>   |                                                |                             |                            |  |
|                 |        |                  |                             | <b>Mycorrhizal carrier medium<br/>Peat (%)</b> |                             |                            |  |
|                 |        |                  | 0                           | 2                                              | 4                           | 6                          |  |
| <b>Sand (%)</b> | 100    |                  | 4.28 (0.241) <sup>c,1</sup> | 10.2(0.413) <sup>d,2</sup>                     | 18.9(0.350) <sup>c,3</sup>  | 20.6(0.914) <sup>d,4</sup> |  |
|                 | 90     |                  | 9.41 (0.277) <sup>b,1</sup> | 19.6(0.409) <sup>c,2</sup>                     | 26.8(0.509) <sup>b,3</sup>  | 31.4(0.596) <sup>c,4</sup> |  |
|                 | 80     |                  | 18.8 (0.254) <sup>a,1</sup> | 29.6(0.631) <sup>b,2</sup>                     | 35.6(0.773) <sup>a,3</sup>  | 40.2(0.883) <sup>b,4</sup> |  |
|                 | 70     |                  | 19.5 (0.308) <sup>a,1</sup> | 28.0(0.536) <sup>a,2</sup>                     | 35.3 (1.17) <sup>a,3</sup>  | 45.4(0.750) <sup>a,4</sup> |  |
|                 |        |                  |                             | <b>Comparisons<br/>Peat (%)</b>                |                             |                            |  |
|                 |        |                  | 0                           | 2                                              | 4                           | 6                          |  |
| <b>Sand (%)</b> | 100    |                  | *                           | *                                              | *                           | *                          |  |
|                 | 90     |                  | *                           | *                                              | *                           | *                          |  |
|                 | 80     |                  | *                           | *                                              | *                           | *                          |  |
|                 | 70     |                  | *                           | *                                              | *                           | *                          |  |



**Table S3h**

|          |        | <b>Ca</b>               | Non-mycorrhizal            |                           |                           |                           |
|----------|--------|-------------------------|----------------------------|---------------------------|---------------------------|---------------------------|
|          |        |                         | Peat (%)                   |                           |                           |                           |
|          |        |                         | 0                          | 2                         | 4                         | 6                         |
| Sand (%) | 100    |                         | 10.6(0.25) <sup>a,1</sup>  | 34.4(2.26) <sup>d,2</sup> | 73.1(0.69) <sup>c,3</sup> | 109(5.84) <sup>c,4</sup>  |
|          | 90     |                         | 38.6(3.00) <sup>c,1</sup>  | 100 (4.63) <sup>c,2</sup> | 180(10.2) <sup>a,3</sup>  | 190(16.3) <sup>b,3</sup>  |
|          | 80     |                         | 67.0(2.67) <sup>b,1</sup>  | 146 (4.21) <sup>b,2</sup> | 257(8.45) <sup>b,3</sup>  | 264(18.6) <sup>a,3</sup>  |
|          | 70     |                         | 72.4(1.21) <sup>b,1</sup>  | 118 (5.93) <sup>a,2</sup> | 163(10.3) <sup>a,3</sup>  | 250(8.02) <sup>a,4</sup>  |
|          |        | Rudua                   | 2.78 (0.73) <sup>a</sup>   |                           |                           |                           |
|          | Rengam | 263 (9.07) <sup>d</sup> |                            |                           |                           |                           |
|          |        |                         | Mycorrhizal carrier medium |                           |                           |                           |
|          |        |                         | Peat (%)                   |                           |                           |                           |
|          |        |                         | 0                          | 2                         | 4                         | 6                         |
| Sand (%) | 100    |                         | 329 (16.4) <sup>c,1</sup>  | 703 (48.8) <sup>d,2</sup> | 1180(20.3) <sup>c,3</sup> | 1210(27.6) <sup>c,3</sup> |
|          | 90     |                         | 475 (43.1) <sup>b,1</sup>  | 1260(39.8) <sup>c,2</sup> | 1550(67.3) <sup>a,3</sup> | 1440(30.4) <sup>b,3</sup> |
|          | 80     |                         | 946 (29.3) <sup>a,1</sup>  | 1780(37.7) <sup>b,2</sup> | 2350(68.7) <sup>b,3</sup> | 2360(62.0) <sup>a,3</sup> |
|          | 70     |                         | 934 (25.7) <sup>a,1</sup>  | 1570(17.9) <sup>a,2</sup> | 1690(99.9) <sup>a,2</sup> | 2310(32.3) <sup>a,3</sup> |
|          |        |                         |                            |                           |                           |                           |
|          |        |                         | Comparisons                |                           |                           |                           |
|          |        |                         | Peat (%)                   |                           |                           |                           |
|          |        |                         | 0                          | 2                         | 4                         | 6                         |
| Sand (%) | 100    |                         | *                          | *                         | *                         | *                         |
|          | 90     |                         | *                          | *                         | *                         | *                         |
|          | 80     |                         | *                          | *                         | *                         | *                         |
|          | 70     |                         | *                          | *                         | *                         | *                         |
|          |        |                         |                            |                           |                           |                           |

**Table S3i**

| Fe       |        | Non-mycorrhizal<br>Peat (%)            |                             |                             |                           |
|----------|--------|----------------------------------------|-----------------------------|-----------------------------|---------------------------|
|          |        | 0                                      | 2                           | 4                           | 6                         |
| Sand (%) | 100    | 17.5(0.291) <sup>a,1</sup>             | 39.8(0.922) <sup>d,2</sup>  | 58.3(4.26) <sup>c,3</sup>   | 82.3(7.49) <sup>d,4</sup> |
|          | 90     | 73.1 (3.19) <sup>d,1</sup>             | 89.5 (1.53) <sup>c,2</sup>  | 116(2.13) <sup>b,3</sup>    | 102 (2.79) <sup>c,4</sup> |
|          | 80     | 108 (2.62) <sup>b,1</sup>              | 123 (5.46) <sup>b,2</sup>   | 175(3.44) <sup>a,3</sup>    | 182 (2.07) <sup>b,3</sup> |
|          | 70     | 144 (5.63) <sup>c,1</sup>              | 166 (5.08) <sup>a,2</sup>   | 180(7.68) <sup>a,2</sup>    | 211 (3.68) <sup>a,3</sup> |
|          | Rudua  | 12.6 (0.37) <sup>a</sup>               |                             |                             |                           |
|          | Rengam | 50.1 (1.81) <sup>e</sup>               |                             |                             |                           |
|          |        | Mycorrhizal carrier medium<br>Peat (%) |                             |                             |                           |
|          |        | 0                                      | 2                           | 4                           | 6                         |
| Sand (%) | 100    | 16.2(0.807) <sup>d,1</sup>             | 29.6(0.141) <sup>c,2</sup>  | 53.4(1.26) <sup>d,3</sup>   | 59.4(2.16) <sup>d,4</sup> |
|          | 90     | 65.2 (2.47) <sup>c,1</sup>             | 66.4(4.24) <sup>b,1,2</sup> | 75.4(3.07) <sup>c,2,3</sup> | 78.5(1.87) <sup>c,3</sup> |
|          | 80     | 72.7 (0.97) <sup>b,1</sup>             | 114 (1.93) <sup>a,2</sup>   | 113 (3.53) <sup>b,2</sup>   | 124 (2.51) <sup>b,3</sup> |
|          | 70     | 112 (4.30) <sup>a,1</sup>              | 109 (0.66) <sup>a,1</sup>   | 137 (6.96) <sup>a,2</sup>   | 145 (1.50) <sup>a,2</sup> |
|          |        | Comparisons<br>Peat (%)                |                             |                             |                           |
|          |        | 0                                      | 2                           | 4                           | 6                         |
| Sand (%) | 100    | NS                                     | *                           | NS                          | *                         |
|          | 90     | *                                      | *                           | *                           | *                         |
|          | 80     | *                                      | *                           | *                           | *                         |
|          | 70     | *                                      | *                           | *                           | *                         |

**Table S3j**

| <b>Mn</b>       |        | <b>Non-mycorrhizal<br/>Peat (%)</b>            |                               |                              |                              |
|-----------------|--------|------------------------------------------------|-------------------------------|------------------------------|------------------------------|
|                 |        | <b>0</b>                                       | <b>2</b>                      | <b>4</b>                     | <b>6</b>                     |
| <b>Sand (%)</b> | 100    | 0.324(0.026) <sup>a,1</sup>                    | 0.415(0.035) <sup>c,1,2</sup> | 0.516(0.022) <sup>c,2</sup>  | 0.727(0.068) <sup>d,3</sup>  |
|                 | 90     | 2.53 (0.411) <sup>d,1</sup>                    | 2.02 (0.215) <sup>b,1</sup>   | 2.15 (0.123) <sup>b,1</sup>  | 1.92 (0.186) <sup>c,1</sup>  |
|                 | 80     | 4.64 (0.170) <sup>c,1</sup>                    | 4.53 (0.399) <sup>a,1</sup>   | 4.97 (0.412) <sup>a,1</sup>  | 3.63 (0.119) <sup>b,2</sup>  |
|                 | 70     | 5.96 (0.717) <sup>b,1</sup>                    | 4.37 (0.718) <sup>a,2,3</sup> | 4.51(0.186) <sup>a,2,3</sup> | 5.26(0.356) <sup>a,1,3</sup> |
|                 | Rudua  | 0.029 (0.003) <sup>a</sup>                     |                               |                              |                              |
|                 | Rengam | 1.54 (0.024) <sup>e</sup>                      |                               |                              |                              |
|                 |        | <b>Mycorrhizal carrier medium<br/>Peat (%)</b> |                               |                              |                              |
|                 |        | <b>0</b>                                       | <b>2</b>                      | <b>4</b>                     | <b>6</b>                     |
| <b>Sand (%)</b> | 100    | 0.678(0.204) <sup>d,1</sup>                    | 1.59 (0.102) <sup>c,2</sup>   | 2.99 (0.223) <sup>b,3</sup>  | 2.78 (0.175) <sup>c,3</sup>  |
|                 | 90     | 1.09 (0.039) <sup>c,1</sup>                    | 2.88 (0.364) <sup>b,2</sup>   | 2.63 (0.262) <sup>b,2</sup>  | 3.93 (0.163) <sup>b,3</sup>  |
|                 | 80     | 2.35 (0.181) <sup>b,1</sup>                    | 3.62 (0.399) <sup>a,b,2</sup> | 4.25 (0.373) <sup>a,2</sup>  | 3.97 (0.311) <sup>b,2</sup>  |
|                 | 70     | 2.91 (0.139) <sup>a,1</sup>                    | 4.00 (0.271) <sup>a,2</sup>   | 4.88 (0.199) <sup>a,3</sup>  | 5.80 (0.293) <sup>a,4</sup>  |
|                 |        | <b>Comparisons<br/>Peat (%)</b>                |                               |                              |                              |
|                 |        | <b>0</b>                                       | <b>2</b>                      | <b>4</b>                     | <b>6</b>                     |
| <b>Sand (%)</b> | 100    | *                                              | *                             | *                            | *                            |
|                 | 90     | *                                              | *                             | *                            | *                            |
|                 | 80     | *                                              | *                             | NS                           | NS                           |
|                 | 70     | *                                              | NS                            | NS                           | NS                           |

**Table S3k**

|          |        | Zn                                     | Non-mycorrhizal<br>Peat (%)   |                              |                              |  |
|----------|--------|----------------------------------------|-------------------------------|------------------------------|------------------------------|--|
|          |        | 0                                      | 2                             | 4                            | 6                            |  |
| Sand (%) | 100    | 1.36(0.165) <sup>a,1</sup>             | 0.991(0.029) <sup>b,1</sup>   | 1.20(0.382) <sup>c,1</sup>   | 1.27(0.247) <sup>b,1</sup>   |  |
|          | 90     | 2.32(0.412) <sup>d,1</sup>             | 1.91 (0.478) <sup>b,1</sup>   | 2.35(0.385) <sup>b,1</sup>   | 2.12(0.383) <sup>b,1</sup>   |  |
|          | 80     | 4.25 0.288) <sup>c,1</sup>             | 4.14 (0.375) <sup>a,1</sup>   | 4.34 0.410) <sup>a,1</sup>   | 4.20 0.082) <sup>a,1</sup>   |  |
|          | 70     | 5.07(0.214) <sup>b,1</sup>             | 3.98 (0.733) <sup>a,1</sup>   | 3.82 (0.21) <sup>a,1</sup>   | 4.63(0.631) <sup>a,1</sup>   |  |
|          | Rudua  | 0.000 (0.000) <sup>e</sup>             |                               |                              |                              |  |
|          | Rengam | 0.308 (0.004) <sup>e</sup>             |                               |                              |                              |  |
|          |        | Mycorrhizal carrier medium<br>Peat (%) |                               |                              |                              |  |
|          |        | 0                                      | 2                             | 4                            | 6                            |  |
| Sand (%) | 100    | 0.631(0.067) <sup>c,1</sup>            | 0.901(0.103) <sup>b,1,3</sup> | 1.33 0.274) <sup>c,2</sup>   | 1.28(0.136) <sup>b,2,3</sup> |  |
|          | 90     | 1.29 (0.191) <sup>b,1</sup>            | 1.51 (0.075) <sup>a,b,1</sup> | 1.44(0.362) <sup>b,c,1</sup> | 1.54 (0.139) <sup>b,1</sup>  |  |
|          | 80     | 1.70(0.158) <sup>a,b,1</sup>           | 2.04 (0.146) <sup>a,1</sup>   | 2.03(0.209) <sup>a,b,1</sup> | 1.73 (0.161) <sup>b,1</sup>  |  |
|          | 70     | 1.97 (0.297) <sup>a,1</sup>            | 2.18 (0.483) <sup>a,1</sup>   | 2.51 (0.157) <sup>a,1</sup>  | 2.64 (0.238) <sup>a,1</sup>  |  |
|          |        | Comparisons<br>Peat (%)                |                               |                              |                              |  |
|          |        | 0                                      | 2                             | 4                            | 6                            |  |
| Sand (%) | 100    | *                                      | NS                            | NS                           | NS                           |  |
|          | 90     | *                                      | NS                            | *                            | NS                           |  |
|          | 80     | *                                      | *                             | *                            | *                            |  |
|          | 70     | *                                      | *                             | *                            | *                            |  |

**Table S3L**

| <b>Cu</b>       |        | <b>Non-mycorrhizal<br/>Peat (%)</b>            |                               |                              |                               |
|-----------------|--------|------------------------------------------------|-------------------------------|------------------------------|-------------------------------|
|                 |        | <b>0</b>                                       | <b>2</b>                      | <b>4</b>                     | <b>6</b>                      |
| <b>Sand (%)</b> | 100    | 0.080(0.046) <sup>a,1</sup>                    | 0.063(0.016) <sup>c,1</sup>   | 0.040(0.032) <sup>c,1</sup>  | 0.052(0.027) <sup>d,1</sup>   |
|                 | 90     | 0.669(0.168) <sup>d,1</sup>                    | 0.587(0.108) <sup>b,1</sup>   | 0.546(0.142) <sup>b,1</sup>  | 0.446(0.051) <sup>c,1</sup>   |
|                 | 80     | 1.22 (0.066) <sup>c,1</sup>                    | 1.07(0.055) <sup>a,1,2</sup>  | 1.08(0.098) <sup>a,1,2</sup> | 0.942(0.030) <sup>b,2</sup>   |
|                 | 70     | 1.79 (0.224) <sup>b,1</sup>                    | 1.35(0.205) <sup>a,1,2</sup>  | 1.24 (0.081) <sup>a,2</sup>  | 1.22 (0.130) <sup>a,2</sup>   |
|                 | Rudua  | 0.000 (0.000) <sup>a</sup>                     |                               |                              |                               |
|                 | Rengam | 0.084 (0.005) <sup>a</sup>                     |                               |                              |                               |
|                 |        | <b>Mycorrhizal carrier medium<br/>Peat (%)</b> |                               |                              |                               |
|                 |        | <b>0</b>                                       | <b>2</b>                      | <b>4</b>                     | <b>6</b>                      |
| <b>Sand (%)</b> | 100    | 0.056(0.013) <sup>c,1</sup>                    | 0.061(0.009) <sup>c,1,2</sup> | 0.102(0.028) <sup>d,2</sup>  | 0.077(0.001) <sup>d,1,2</sup> |
|                 | 90     | 0.647(0.025) <sup>b,1</sup>                    | 0.614 (0.110) <sup>b,1</sup>  | 0.575(0.067) <sup>c,1</sup>  | 0.554 (0.035) <sup>c,1</sup>  |
|                 | 80     | 1.24 (0.108) <sup>a,1</sup>                    | 1.22 (0.151) <sup>a,1</sup>   | 1.11(0.082) <sup>b,1,2</sup> | 0.919 (0.076) <sup>b,2</sup>  |
|                 | 70     | 1.34 (0.147) <sup>a,1</sup>                    | 1.40 (0.181) <sup>a,1</sup>   | 1.35 (0.120) <sup>a,1</sup>  | 1.24 (0.126) <sup>a,1</sup>   |
|                 |        | <b>Comparisons<br/>Peat (%)</b>                |                               |                              |                               |
|                 |        | <b>0</b>                                       | <b>2</b>                      | <b>4</b>                     | <b>6</b>                      |
| <b>Sand (%)</b> | 100    | NS                                             | NS                            | NS                           | NS                            |
|                 | 90     | NS                                             | NS                            | NS                           | *                             |
|                 | 80     | NS                                             | NS                            | NS                           | NS                            |
|                 | 70     | *                                              | NS                            | NS                           | NS                            |

**Table S3m**

|          |        | Ni                         | Non-mycorrhizal<br>Peat (%)            |                               |                               |                             |
|----------|--------|----------------------------|----------------------------------------|-------------------------------|-------------------------------|-----------------------------|
|          |        |                            | 0                                      | 2                             | 4                             | 6                           |
| Sand (%) | 100    |                            | 0.056(0.023) <sup>a,1</sup>            | 0.034(0.010) <sup>c,1</sup>   | 0.048(0.015) <sup>b,1</sup>   | 0.046(0.015) <sup>d,1</sup> |
|          | 90     |                            | 0.352 (0.019) <sup>c,1</sup>           | 0.197(0.023) <sup>b,2</sup>   | 0.311(0.063) <sup>a,1</sup>   | 0.158(0.020) <sup>c,2</sup> |
|          | 80     |                            | 0.276 (0.018) <sup>b,1</sup>           | 0.241(0.010) <sup>a,1,2</sup> | 0.237(0.024) <sup>a,1,2</sup> | 0.233(0.004) <sup>b,2</sup> |
|          | 70     |                            | 0.311(0.010) <sup>b,1,4</sup>          | 0.252(0.013) <sup>a,2,3</sup> | 0.277(0.014) <sup>a,1,3</sup> | 0.323(0.017) <sup>a,4</sup> |
|          | Rudua  | 0.000 (0.000) <sup>d</sup> |                                        |                               |                               |                             |
|          | Rengam | 0.013 (0.003) <sup>d</sup> |                                        |                               |                               |                             |
|          |        |                            | Mycorrhizal carrier medium<br>Peat (%) |                               |                               |                             |
|          |        |                            | 0                                      | 2                             | 4                             | 6                           |
| Sand (%) | 100    |                            | 0.021 (0.006) <sup>b,1</sup>           | 0.045 (0.002) <sup>c,2</sup>  | 0.059(0.009) <sup>c,2,3</sup> | 0.078(0.012) <sup>c,3</sup> |
|          | 90     |                            | 0.162 (0.026) <sup>a,1</sup>           | 0.203 (0.003) <sup>a,1</sup>  | 0.171 (0.020) <sup>b,1</sup>  | 0.163(0.008) <sup>b,1</sup> |
|          | 80     |                            | 0.126 (0.010) <sup>a,1</sup>           | 0.165 (0.007) <sup>b,2</sup>  | 0.172 (0.007) <sup>b,2</sup>  | 0.173(0.012) <sup>b,2</sup> |
|          | 70     |                            | 0.154 (0.003) <sup>a,1</sup>           | 0.195(0.017) <sup>a,1,2</sup> | 0.239 (0.013) <sup>a,2</sup>  | 0.254(0.040) <sup>a,2</sup> |
|          |        |                            | Comparisons<br>Peat (%)                |                               |                               |                             |
|          |        |                            | 0                                      | 2                             | 4                             | 6                           |
| Sand (%) | 100    |                            | NS                                     | NS                            | NS                            | *                           |
|          | 90     |                            | *                                      | NS                            | *                             | NS                          |
|          | 80     |                            | *                                      | *                             | *                             | *                           |
|          | 70     |                            | *                                      | *                             | *                             | NS                          |

Table S3n

|          |        | AI                      | Non-mycorrhizal            |                            |                          |                          |
|----------|--------|-------------------------|----------------------------|----------------------------|--------------------------|--------------------------|
|          |        |                         | Peat (%)                   |                            |                          |                          |
|          |        |                         | 0                          | 2                          | 4                        | 6                        |
| Sand (%) | 100    |                         | 107(0.63) <sup>a,1</sup>   | 145(2.66) <sup>d,2</sup>   | 210(16.3) <sup>c,3</sup> | 307(21.0) <sup>d,4</sup> |
|          | 90     |                         | 371(14.9) <sup>b,1</sup>   | 402(10.6) <sup>c,1,3</sup> | 470(17.7) <sup>b,2</sup> | 427(6.97) <sup>c,3</sup> |
|          | 80     |                         | 486(13.7) <sup>c,1</sup>   | 505 (16.4) <sup>b,1</sup>  | 704(6.97) <sup>a,2</sup> | 716(28.7) <sup>b,2</sup> |
|          | 70     |                         | 630(34.6) <sup>d,1</sup>   | 705 (13.2) <sup>a,2</sup>  | 723(40.5) <sup>a,2</sup> | 855(16.2) <sup>a,3</sup> |
|          |        | Rudua                   | 12.2 (1.32) <sup>e</sup>   |                            |                          |                          |
|          | Rengam | 742 (12.5) <sup>f</sup> |                            |                            |                          |                          |
|          |        |                         | Mycorrhizal carrier medium |                            |                          |                          |
|          |        |                         | Peat (%)                   |                            |                          |                          |
|          |        |                         | 0                          | 2                          | 4                        | 6                        |
| Sand (%) | 100    |                         | 104(6.86) <sup>d,1</sup>   | 141 (2.20) <sup>c,2</sup>  | 228(5.70) <sup>d,3</sup> | 257(5.20) <sup>d,4</sup> |
|          | 90     |                         | 364(15.3) <sup>c,1</sup>   | 357 (12.9) <sup>b,1</sup>  | 351(8.79) <sup>c,1</sup> | 363(10.3) <sup>c,1</sup> |
|          | 80     |                         | 416(10.7) <sup>b,1</sup>   | 571 (14.2) <sup>a,2</sup>  | 537(26.6) <sup>b,2</sup> | 544(7.93) <sup>b,2</sup> |
|          | 70     |                         | 612(32.4) <sup>a,1</sup>   | 590 (3.51) <sup>a,1</sup>  | 638(39.0) <sup>a,1</sup> | 648(8.96) <sup>a,1</sup> |
|          |        |                         | Comparisons                |                            |                          |                          |
|          |        |                         | Peat (%)                   |                            |                          |                          |
|          |        |                         | 0                          | 2                          | 4                        | 6                        |
| Sand (%) | 100    |                         | NS                         | NS                         | NS                       | *                        |
|          | 90     |                         | NS                         | *                          | *                        | *                        |
|          | 80     |                         | *                          | *                          | *                        | *                        |
|          | 70     |                         | NS                         | *                          | NS                       | *                        |

**Table S3o**

|          |        | As                                  |                               |                               |                               |  |
|----------|--------|-------------------------------------|-------------------------------|-------------------------------|-------------------------------|--|
|          |        | Non-mycorrhizal Peat (%)            |                               |                               |                               |  |
|          |        | 0                                   | 2                             | 4                             | 6                             |  |
| Sand (%) | 100    | 0.055(0.003) <sup>a,1</sup>         | 0.039(0.001) <sup>d,2</sup>   | 0.033(0.005) <sup>c,2</sup>   | 0.038(0.003) <sup>d,2</sup>   |  |
|          | 90     | 0.139(0.008) <sup>d,1</sup>         | 0.127(0.007) <sup>c,1,2</sup> | 0.119(0.003) <sup>b,2</sup>   | 0.102(0.006) <sup>c,2,3</sup> |  |
|          | 80     | 0.166(0.011) <sup>c,1</sup>         | 0.151(0.006) <sup>b,1</sup>   | 0.163(0.006) <sup>a,1</sup>   | 0.149(0.008) <sup>b,1</sup>   |  |
|          | 70     | 0.186(0.005) <sup>b,1</sup>         | 0.191(0.004) <sup>a,1</sup>   | 0.180(0.012) <sup>a,1</sup>   | 0.191(0.005) <sup>a,1</sup>   |  |
|          | Rudua  | 0.002(0.000) <sup>e</sup>           |                               |                               |                               |  |
|          | Rengam | 0.060(0.003) <sup>a</sup>           |                               |                               |                               |  |
|          |        | Mycorrhizal carrier medium Peat (%) |                               |                               |                               |  |
|          |        | 0                                   | 2                             | 4                             | 6                             |  |
| Sand (%) | 100    | 0.097(0.000) <sup>b,1</sup>         | 0.111(0.011) <sup>b,1,2</sup> | 0.117(0.006) <sup>c,2</sup>   | 0.108(0.007) <sup>c,1,2</sup> |  |
|          | 90     | 0.155(0.008) <sup>a,1</sup>         | 0.190(0.005) <sup>a,2</sup>   | 0.178(0.010) <sup>b,2</sup>   | 0.154(0.010) <sup>b,1</sup>   |  |
|          | 80     | 0.181(0.022) <sup>a,1</sup>         | 0.195(0.009) <sup>a,1</sup>   | 0.198(0.018) <sup>a,b,1</sup> | 0.193(0.015) <sup>a,1</sup>   |  |
|          | 70     | 0.185(0.008) <sup>a,1</sup>         | 0.197(0.005) <sup>a,1,2</sup> | 0.208(0.003) <sup>a,2</sup>   | 0.209(0.004) <sup>a,2</sup>   |  |
|          |        | Comparisons Peat (%)                |                               |                               |                               |  |
|          |        | 0                                   | 2                             | 4                             | 6                             |  |
| Sand (%) | 100    | *                                   | *                             | *                             | *                             |  |
|          | 90     | NS                                  | *                             | *                             | *                             |  |
|          | 80     | NS                                  | *                             | *                             | *                             |  |
|          | 70     | NS                                  | NS                            | *                             | *                             |  |



**Table S3p**

| La       |        | Non-mycorrhizal<br>Peat (%)            |                             |                             |                               |
|----------|--------|----------------------------------------|-----------------------------|-----------------------------|-------------------------------|
|          |        | 0                                      | 2                           | 4                           | 6                             |
| Sand (%) | 100    | 0.045(0.060) <sup>a,1</sup>            | 0.002(0.001) <sup>d,2</sup> | 0.000(0.000) <sup>d,2</sup> | 0.000(0.000) <sup>c,2</sup>   |
|          | 90     | 0.262(0.022) <sup>d,1</sup>            | 0.111(0.004) <sup>c,2</sup> | 0.078(0.002) <sup>c,3</sup> | 0.098(0.004) <sup>b,2,3</sup> |
|          | 80     | 0.450(0.012) <sup>c,1</sup>            | 0.244(0.142) <sup>b,2</sup> | 0.155(0.004) <sup>b,3</sup> | 0.106 (0.002) <sup>b,4</sup>  |
|          | 70     | 0.519(0.013) <sup>b,1</sup>            | 0.295(0.005) <sup>a,2</sup> | 0.230(0.007) <sup>a,3</sup> | 0.183 (0.006) <sup>a,4</sup>  |
|          | Rudua  | 0.000 (0.000) <sup>f</sup>             |                             |                             |                               |
|          | Rengam | 0.150 (0.001) <sup>e</sup>             |                             |                             |                               |
|          |        | Mycorrhizal carrier medium<br>Peat (%) |                             |                             |                               |
|          |        | 0                                      | 2                           | 4                           | 6                             |
| Sand (%) | 100    | 0.057(0.003) <sup>d,1</sup>            | 0.029(0.001) <sup>d,2</sup> | 0.012(0.002) <sup>c,3</sup> | 0.036 (0.005) <sup>c,2</sup>  |
|          | 90     | 0.259(0.007) <sup>c,1</sup>            | 0.139(0.002) <sup>c,2</sup> | 0.125(0.011) <sup>b,2</sup> | 0.122 (0.006) <sup>b,2</sup>  |
|          | 80     | 0.382(0.009) <sup>b,1</sup>            | 0.201(0.005) <sup>b,2</sup> | 0.133(0.002) <sup>b,3</sup> | 0.113 (0.005) <sup>b,4</sup>  |
|          | 70     | 0.438(0.011) <sup>a,1</sup>            | 0.258(0.009) <sup>a,2</sup> | 0.193(0.009) <sup>a,3</sup> | 0.136 (0.005) <sup>a,4</sup>  |
|          |        | Comparisons<br>Peat (%)                |                             |                             |                               |
|          |        | 0                                      | 2                           | 4                           | 6                             |
| Sand (%) | 100    | *                                      | *                           | *                           | *                             |
|          | 90     | NS                                     | *                           | *                           | *                             |
|          | 80     | *                                      | *                           | *                           | NS                            |
|          | 70     | *                                      | *                           | *                           | *                             |

**Table S3q**

|                 |        | <b>Pb</b>                    | <b>Non-mycorrhizal</b>            |                              |                              |          |
|-----------------|--------|------------------------------|-----------------------------------|------------------------------|------------------------------|----------|
|                 |        |                              | <b>Peat (%)</b>                   |                              |                              |          |
|                 |        |                              | <b>0</b>                          | <b>2</b>                     | <b>4</b>                     | <b>6</b> |
| <b>Sand (%)</b> | 100    | 1.00(0.172) <sup>a,1</sup>   | 1.72(0.247) <sup>d,2</sup>        | 1.72(0.072) <sup>d,2</sup>   | 1.79(0.040) <sup>d,2</sup>   |          |
|                 | 90     | 3.89(0.611) <sup>d,1,2</sup> | 3.53(0.311) <sup>c,1</sup>        | 4.55(0.271) <sup>c,2</sup>   | 3.43(0.182) <sup>c,1</sup>   |          |
|                 | 80     | 6.81 (0.159) <sup>c,1</sup>  | 6.57(0.716) <sup>b,1</sup>        | 6.97(0.414) <sup>b,1</sup>   | 6.43(0.045) <sup>b,1</sup>   |          |
|                 | 70     | 8.57 (0.925) <sup>b,1</sup>  | 8.93(0.963) <sup>a,1</sup>        | 9.60(0.894) <sup>a,1</sup>   | 9.20(0.713) <sup>a,1</sup>   |          |
|                 | Rudua  | 0.019 (0.000) <sup>a</sup>   |                                   |                              |                              |          |
|                 | Rengam | 0.477 (0.018) <sup>d</sup>   |                                   |                              |                              |          |
|                 |        |                              | <b>Mycorrhizal carrier medium</b> |                              |                              |          |
|                 |        |                              | <b>Peat (%)</b>                   |                              |                              |          |
|                 |        |                              | <b>0</b>                          | <b>2</b>                     | <b>4</b>                     | <b>6</b> |
| <b>Sand (%)</b> | 100    | 1.03 (0.099) <sup>d,1</sup>  | 1.15(0.098) <sup>c,1,2</sup>      | 1.26(0.029) <sup>d,2,3</sup> | 1.47(0.095) <sup>d,3</sup>   |          |
|                 | 90     | 3.62 (0.250) <sup>c,1</sup>  | 3.00(0.231) <sup>b,1</sup>        | 3.43 (0.521) <sup>c,1</sup>  | 3.20(0.114) <sup>c,1</sup>   |          |
|                 | 80     | 4.86(0.384) <sup>b,1,3</sup> | 6.61 (0.685) <sup>a,2</sup>       | 6.12(0.450) <sup>b,2,3</sup> | 6.15(0.431) <sup>b,2,3</sup> |          |
|                 | 70     | 7.18 (0.640) <sup>a,1</sup>  | 7.27 (0.934) <sup>a,1</sup>       | 7.68 (0.815) <sup>a,1</sup>  | 7.20 (0.321) <sup>a,1</sup>  |          |
|                 |        |                              | <b>Comparisons</b>                |                              |                              |          |
|                 |        |                              | <b>Peat (%)</b>                   |                              |                              |          |
|                 |        |                              | <b>0</b>                          | <b>2</b>                     | <b>4</b>                     | <b>6</b> |
| <b>Sand (%)</b> | 100    | NS                           | *                                 | *                            | *                            |          |
|                 | 90     | NS                           | NS                                | *                            | NS                           |          |
|                 | 80     | *                            | NS                                | NS                           | NS                           |          |
|                 | 70     | NS                           | NS                                | NS                           | *                            |          |

**Table S3r**

|          |        | <b>U</b>                            |                             |                               |                               |  |
|----------|--------|-------------------------------------|-----------------------------|-------------------------------|-------------------------------|--|
|          |        | Non-mycorrhizal Peat (%)            |                             |                               |                               |  |
|          |        | 0                                   | 2                           | 4                             | 6                             |  |
| Sand (%) | 100    | 0.164(0.015) <sup>a,1</sup>         | 0.078(0.005) <sup>c,2</sup> | 0.028(0.002) <sup>c,3</sup>   | 0.018(0.002) <sup>c,3</sup>   |  |
|          | 90     | 0.267(0.030) <sup>b,1</sup>         | 0.117(0.004) <sup>b,2</sup> | 0.068(0.007) <sup>b,3</sup>   | 0.062(0.006) <sup>b,3</sup>   |  |
|          | 80     | 0.350(0.018) <sup>c,1</sup>         | 0.149(0.013) <sup>a,2</sup> | 0.091(0.014) <sup>a,b,3</sup> | 0.057(0.003) <sup>b,3</sup>   |  |
|          | 70     | 0.299(0.016) <sup>b,1</sup>         | 0.160(0.009) <sup>a,2</sup> | 0.112(0.013) <sup>a,3</sup>   | 0.077(0.004) <sup>a,4</sup>   |  |
|          | Rudua  | 0.000(0.000) <sup>d</sup>           |                             |                               |                               |  |
|          | Rengam | 0.005(0.001) <sup>d</sup>           |                             |                               |                               |  |
|          |        | Mycorrhizal carrier medium Peat (%) |                             |                               |                               |  |
|          |        | 0                                   | 2                           | 4                             | 6                             |  |
| Sand (%) | 100    | 0.158(0.008) <sup>b,1</sup>         | 0.055(0.004) <sup>d,2</sup> | 0.021(0.002) <sup>c,3</sup>   | 0.014(0.002) <sup>c,3</sup>   |  |
|          | 90     | 0.253(0.026) <sup>a,1</sup>         | 0.098(0.002) <sup>c,2</sup> | 0.061(0.012) <sup>b,2</sup>   | 0.062(0.004) <sup>b,2</sup>   |  |
|          | 80     | 0.301(0.019) <sup>a,1</sup>         | 0.134(0.010) <sup>b,2</sup> | 0.071(0.006) <sup>b,3</sup>   | 0.055(0.001) <sup>a,3</sup>   |  |
|          | 70     | 0.308(0.044) <sup>a,1</sup>         | 0.172(0.016) <sup>a,2</sup> | 0.114(0.008) <sup>a,2,3</sup> | 0.061(0.003) <sup>a,b,3</sup> |  |
|          |        | Comparisons Peat (%)                |                             |                               |                               |  |
|          |        | 0                                   | 2                           | 4                             | 6                             |  |
| Sand (%) | 100    | NS                                  | *                           | *                             | *                             |  |
|          | 90     | NS                                  | *                           | NS                            | NS                            |  |
|          | 80     | *                                   | NS                          | NS                            | NS                            |  |
|          | 70     | NS                                  | NS                          | NS                            | *                             |  |

**Table S3s.**

|             |        | ECEC                      | Non-mycorrhizal<br>Peat (%) |                           |                           |   |
|-------------|--------|---------------------------|-----------------------------|---------------------------|---------------------------|---|
|             |        |                           | 0                           | 2                         | 4                         | 6 |
| Sand<br>(%) | 100    | 0.38(0.02) <sup>a,1</sup> | 0.61(0.03) <sup>a,2</sup>   | 1.23(0.03) <sup>a,3</sup> | 1.81(0.03) <sup>a,4</sup> |   |
|             | 90     | 1.43(0.04) <sup>b,1</sup> | 2.03(0.06) <sup>b,2</sup>   | 3.04(0.07) <sup>b,3</sup> | 3.24(0.13) <sup>b,3</sup> |   |
|             | 80     | 2.58(0.09) <sup>c,1</sup> | 3.29(0.10) <sup>c,2</sup>   | 4.44(0.03) <sup>c,3</sup> | 4.80(0.11) <sup>c,4</sup> |   |
|             | 70     | 3.18(0.03) <sup>d,1</sup> | 3.63(0.03) <sup>d,2</sup>   | 4.53(0.09) <sup>c,3</sup> | 5.43(0.11) <sup>d,4</sup> |   |
|             | Rudua  | 1.03 (0.04) <sup>e</sup>  |                             |                           |                           |   |
|             | Rengam | 3.26 (0.09) <sup>d</sup>  |                             |                           |                           |   |

**Table S4a**

**Dry weights (mean and standard deviation) of Millet (*Panicum miliaceum*) in various artificial and natural soils (mg). Different alphabetical superscripts within columns indicate significant differences (at  $p \leq 0.05$ ), as do different numerical superscripts within rows ( $n=4$ ).**

|                 |               | <b>Non-mycorrhizal</b>            |                                   |                                  |                                 |
|-----------------|---------------|-----------------------------------|-----------------------------------|----------------------------------|---------------------------------|
|                 |               | <b>Peat (%)</b>                   |                                   |                                  |                                 |
|                 |               | <b>0</b>                          | <b>2</b>                          | <b>4</b>                         | <b>6</b>                        |
| <b>Sand (%)</b> | <b>100</b>    | 2.98<br>(1.26) <sup>a,1</sup>     | 13.0<br>(5.88) <sup>a,2</sup>     | 13.5<br>(3.54) <sup>a,2</sup>    | 10.7<br>(2.33) <sup>a,1,2</sup> |
|                 | <b>90</b>     | 2.64<br>(0.00) <sup>a,1</sup>     | 4.64<br>(1.94) <sup>b,1,2</sup>   | 7.03<br>(1.66) <sup>b,2</sup>    | 7.95<br>(2.26) <sup>a,2</sup>   |
|                 | <b>80</b>     | 2.24<br>(0.76) <sup>a,1</sup>     | 4.91<br>(1.22) <sup>b,1,2</sup>   | 6.67<br>(3.01) <sup>b,2</sup>    | 7.79<br>(2.09) <sup>a,2</sup>   |
|                 | <b>70</b>     | 6.02<br>(0.86) <sup>a,1</sup>     | 5.56<br>(0.84) <sup>b,1</sup>     | 5.02<br>(1.56) <sup>b,1</sup>    | 6.50<br>(2.42) <sup>a,1</sup>   |
|                 | <b>Rudua</b>  | 9.00 (0.82) <sup>a</sup>          |                                   |                                  |                                 |
|                 | <b>Rengam</b> | 52.4 (7.71) <sup>b</sup>          |                                   |                                  |                                 |
|                 |               | <b>Mycorrhizal</b>                |                                   |                                  |                                 |
|                 |               | <b>Peat (%)</b>                   |                                   |                                  |                                 |
|                 |               | <b>0</b>                          | <b>2</b>                          | <b>4</b>                         | <b>6</b>                        |
| <b>Sand (%)</b> | <b>100</b>    | 90.3<br>(9.70) <sup>a,b,1,2</sup> | 110<br>(5.15) <sup>a,b,1</sup>    | 63.7<br>(18.3) <sup>c,2</sup>    | 94.8<br>(19.4) <sup>a,1</sup>   |
|                 | <b>90</b>     | 64.5<br>(40.5) <sup>b,1</sup>     | 87.7<br>(13.0) <sup>b,1,2</sup>   | 138 (26.0) <sup>b,2</sup>        | 102<br>(14.6) <sup>a,1,2</sup>  |
|                 | <b>80</b>     | 136 (25.3) <sup>a,1</sup>         | 82.7<br>(23.6) <sup>b,2</sup>     | 94.3<br>(8.4) <sup>a,c,1,2</sup> | 117<br>(25.3) <sup>a,1,2</sup>  |
|                 | <b>70</b>     | 129 (14.6) <sup>a,1</sup>         | 134 (23.0) <sup>a,1</sup>         | 111<br>(17.6) <sup>a,b,1,2</sup> | 82.9<br>(17.9) <sup>a,2</sup>   |
|                 |               | <b>Mycorrhizal carrier medium</b> |                                   |                                  |                                 |
|                 |               | <b>Peat (%)</b>                   |                                   |                                  |                                 |
|                 |               | <b>0</b>                          | <b>2</b>                          | <b>4</b>                         | <b>6</b>                        |
| <b>Sand (%)</b> | <b>100</b>    | 61.0<br>(11.9) <sup>b,1,2</sup>   | 120 (49.2) <sup>b,1</sup>         | 66.3<br>(32.3) <sup>a,1,2</sup>  | 29.8<br>(18.7) <sup>a,2</sup>   |
|                 | <b>90</b>     | 89.5<br>(24.3) <sup>a,b,1</sup>   | 69.9<br>(11.0) <sup>a,b,1,2</sup> | 47.6<br>(7.61) <sup>a,2</sup>    | 43.1<br>(5.45) <sup>a,2</sup>   |
|                 | <b>80</b>     | 61.7<br>(18.6) <sup>b,1</sup>     | 36.8<br>(5.23) <sup>a,2</sup>     | 31.8<br>(4.24) <sup>a,2</sup>    | 26.5<br>(6.94) <sup>a,2</sup>   |
|                 | <b>70</b>     | 115 (28.9) <sup>a,1</sup>         | 58.1<br>(26.8) <sup>a,2</sup>     | 48.0<br>(9.52) <sup>a,2</sup>    | 31.4<br>(3.16) <sup>a,2</sup>   |

| Factor             | df | Non-mycorrhizal |          | Mycorrhizal |          | Carrier only |          |
|--------------------|----|-----------------|----------|-------------|----------|--------------|----------|
|                    |    | <i>F</i>        | <i>p</i> | <i>F</i>    | <i>p</i> | <i>F</i>     | <i>p</i> |
| <b>Sand</b>        | 3  | 12.83           | 0.000    | 4.34        | 0.009    | 6.55         | 0.001    |
| <b>Peat</b>        | 3  | 11.15           | 0.000    | 0.22        | 0.880    | 18.37        | 0.000    |
| <b>Sand x Peat</b> | 9  | 3.53            | 0.002    | 7.54        | 0.000    | 4.57         | 0.000    |

**Table S4b . Two-way ANOVA of main effects and their interaction under three mycorrhizal regimes on the dry weights of *Panicum miliaceum*.**

| Factor             | df | Non-mycorrhizal |          | Mycorrhizal |          | Carrier only |          |
|--------------------|----|-----------------|----------|-------------|----------|--------------|----------|
|                    |    | <i>F</i>        | <i>p</i> | <i>F</i>    | <i>p</i> | <i>F</i>     | <i>p</i> |
| <b>Sand</b>        | 3  | 17.19           | 0.000    | 1.03        | 0.389    | 31.82        | 0.000    |
| <b>Peat</b>        | 3  | 51.11           | 0.000    | 6.12        | 0.001    | 3.68         | 0.018    |
| <b>Sand x Peat</b> | 9  | 7.30            | 0.000    | 3.03        | 0.006    | 2.70         | 0.013    |

**Table S5a. Two-way ANOVA of main effects and their interaction under three mycorrhizal regimes on the dry weights of *Panicum miliaceum*.**

|                 |            | <b>Non-mycorrhizal</b>            |                             |                             |                             |
|-----------------|------------|-----------------------------------|-----------------------------|-----------------------------|-----------------------------|
|                 |            | <b>Peat (%)</b>                   |                             |                             |                             |
|                 |            | <b>0</b>                          | <b>2</b>                    | <b>4</b>                    | <b>6</b>                    |
| <b>Sand (%)</b> | <b>100</b> | 24.8(3.01) <sup>a,1</sup>         | 43.6(28.2) <sup>a,1</sup>   | 32.9(5.29) <sup>a,1</sup>   | 22.6(9.74) <sup>a,1</sup>   |
|                 | <b>90</b>  | 140 (41.4) <sup>a,1</sup>         | 68.4(18.5) <sup>a,b,2</sup> | 50.8(19.9) <sup>a,2</sup>   | 44.2(8.88) <sup>b,2</sup>   |
|                 | <b>80</b>  | 129 (20.2) <sup>a,1</sup>         | 61.3(20.6) <sup>a,b,2</sup> | 34.4(16.8) <sup>a,2</sup>   | 31.8(8.13) <sup>a,b,2</sup> |
|                 | <b>70</b>  | 168 (47.6) <sup>a,1</sup>         | 91.4 (14.7) <sup>b,2</sup>  | 39.5(13.5) <sup>a,2,3</sup> | 21.1 (7.91) <sup>a,3</sup>  |
| <b>Rudua</b>    |            | 130 (38.1) <sup>a</sup>           |                             |                             |                             |
| <b>Rengam</b>   |            | 2260 (789) <sup>b</sup>           |                             |                             |                             |
|                 |            | <b>Mycorrhizal</b>                |                             |                             |                             |
|                 |            | <b>Peat (%)</b>                   |                             |                             |                             |
|                 |            | <b>0</b>                          | <b>2</b>                    | <b>4</b>                    | <b>6</b>                    |
| <b>Sand (%)</b> | <b>100</b> | 1830(158) <sup>a,1</sup>          | 2260 (296) <sup>a,1</sup>   | 2450 (390) <sup>a,1</sup>   | 2120(710) <sup>a,b,1</sup>  |
|                 | <b>90</b>  | 1980(404) <sup>a,1</sup>          | 2550 (195) <sup>a,1</sup>   | 2040 (653) <sup>a,1</sup>   | 2530 (113) <sup>b,1</sup>   |
|                 | <b>80</b>  | 2060(523) <sup>a,1,2</sup>        | 2350 (593) <sup>a,1</sup>   | 2300(115) <sup>a,1,2</sup>  | 1400 (409) <sup>a,2</sup>   |
|                 | <b>70</b>  | 2430 (155) <sup>a,1</sup>         | 2890 (314) <sup>a,1</sup>   | 2130(681) <sup>a,1,2</sup>  | 1490 (381) <sup>a,2</sup>   |
|                 |            | <b>Mycorrhizal carrier medium</b> |                             |                             |                             |
|                 |            | <b>Peat (%)</b>                   |                             |                             |                             |
|                 |            | <b>0</b>                          | <b>2</b>                    | <b>4</b>                    | <b>6</b>                    |
| <b>Sand (%)</b> | <b>100</b> | 28.5 (6.36) <sup>b,1</sup>        | 259 (84.5) <sup>b,2</sup>   | 234 (24.2) <sup>b,2</sup>   | 299 (39.8) <sup>b,2</sup>   |
|                 | <b>90</b>  | 735 (255) <sup>a,1</sup>          | 582 (200) <sup>ab,1</sup>   | 531 (175) <sup>a,b,1</sup>  | 400 (129) <sup>a,b,1</sup>  |
|                 | <b>80</b>  | 742 (110) <sup>a,1,2</sup>        | 777 (179) <sup>a,1</sup>    | 480 (125) <sup>a,b,2</sup>  | 566 (136) <sup>a,1,2</sup>  |
|                 | <b>70</b>  | 871 (269) <sup>a,1</sup>          | 775 (144) <sup>a,1</sup>    | 695 (276) <sup>a,1</sup>    | 522 (50.4) <sup>a,1</sup>   |

**Table S5b. Dry weights (mean and standard deviation) of Kudzu (*Pueraria phaseoloides*) in various artificial and natural soils (mg). Different alphabetical superscripts within columns indicate significant differences (at  $p \leq 0.05$ ), as do different numerical superscripts within rows (n=4).**



|          |              | <i>Panicum miliaceum</i>   |      |      |      | <i>Pueraria phaseoloides</i> |      |      |      |
|----------|--------------|----------------------------|------|------|------|------------------------------|------|------|------|
|          |              | Non-mycorrhizal            |      |      |      |                              |      |      |      |
|          |              | Peat (%)                   |      |      |      | Peat (%)                     |      |      |      |
|          |              | 0                          | 2    | 4    | 6    | 0                            | 2    | 4    | 6    |
| Sand (%) | 100          | 834                        | 355  | 137  | 84.5 | 4530                         | 2230 | 859  | 372  |
|          | 90           | 852                        | 611  | 625  | 307  | 1310                         | 2330 | 1920 | 1260 |
|          | 80           | 2350                       | 1660 | 1590 | 1240 | 1010                         | 3670 | 1470 | 1680 |
|          | 70           | 1600                       | 1700 | 2310 | 3620 | 1460                         | 1640 | 1630 | 2420 |
|          | Rudua Rengam | 142                        |      |      |      | 467                          |      |      |      |
|          |              |                            |      |      |      |                              |      |      |      |
|          |              | Mycorrhizal                |      |      |      |                              |      |      |      |
|          |              | Peat (%)                   |      |      |      | Peat (%)                     |      |      |      |
|          |              | 0                          | 2    | 4    | 6    | 0                            | 2    | 4    | 6    |
| Sand (%) | 100          | 47.6                       | 46.2 | 36.6 | 38.6 | 256                          | 273  | 198  | 240  |
|          | 90           | 87.0                       | 112  | 70.6 | 53.2 | 319                          | 388  | 311  | 269  |
|          | 80           | 196                        | 169  | 125  | 286  | 421                          | 467  | 389  | 313  |
|          | 70           | 228                        | 57.8 | 194  | 193  | 311                          | 314  | 303  | 285  |
|          |              |                            |      |      |      |                              |      |      |      |
|          |              | Mycorrhizal carrier medium |      |      |      |                              |      |      |      |
|          |              | Peat (%)                   |      |      |      | Peat (%)                     |      |      |      |
|          |              | 0                          | 2    | 4    | 6    | 0                            | 2    | 4    | 6    |
| Sand (%) | 100          | 62.1                       | 37.1 | 47.2 | 26.0 | 339                          | 256  | 154  | 150  |
|          | 90           | 151                        | 167  | 36.4 | 129  | 402                          | 492  | 267  | 276  |
|          | 80           | 85.6                       | 107  | 56.8 | 74.2 | 451                          | 329  | 372  | 250  |
|          | 70           | 84.9                       | 67.4 | 120  | 181  | 536                          | 584  | 235  | 238  |
|          |              |                            |      |      |      |                              |      |      |      |

Table S6a. Al concentrations in foliage of *Panicum miliaceum* and *Pueraria phaseoloides* ( $\mu\text{g g}^{-1}$ ).

|          |              | <i>Panicum miliaceum</i>   |      |      |      | <i>Pueraria phaseoloides</i> |      |      |     |
|----------|--------------|----------------------------|------|------|------|------------------------------|------|------|-----|
|          |              | Non-mycorrhizal            |      |      |      |                              |      |      |     |
|          |              | Peat (%)                   |      |      |      | Peat (%)                     |      |      |     |
|          |              | 0                          | 2    | 4    | 6    | 0                            | 2    | 4    | 6   |
| Sand (%) | 100          | 46.2                       | 32.9 | 29.6 | 26.1 | 268                          | 398  | 386  | 504 |
|          | 90           | 165                        | 81.4 | 60.1 | 44.3 | 738                          | 1040 | 673  | 781 |
|          | 80           | 253                        | 205  | 136  | 101  | 940                          | 962  | 1058 | 697 |
|          | 70           | 141                        | 163  | 151  | 180  | 951                          | 911  | 809  | 692 |
|          | Rudua Rengam | 27.5                       |      |      |      | 101                          |      |      |     |
|          | 57.9         |                            |      |      | 228  |                              |      |      |     |
|          |              | Mycorrhizal                |      |      |      |                              |      |      |     |
|          |              | Peat (%)                   |      |      |      | Peat (%)                     |      |      |     |
|          |              | 0                          | 2    | 4    | 6    | 0                            | 2    | 4    | 6   |
| Sand (%) | 100          | 50.8                       | 33.5 | 58.5 | 115  | 79.4                         | 156  | 211  | 184 |
|          | 90           | 139                        | 107  | 160  | 115  | 190                          | 242  | 272  | 263 |
|          | 80           | 127                        | 118  | 136  | 142  | 275                          | 220  | 188  | 201 |
|          | 70           | 129                        | 122  | 121  | 129  | 259                          | 237  | 306  | 408 |
|          |              |                            |      |      |      |                              |      |      |     |
|          |              | Mycorrhizal carrier medium |      |      |      |                              |      |      |     |
|          |              | Peat (%)                   |      |      |      | Peat (%)                     |      |      |     |
|          |              | 0                          | 2    | 4    | 6    | 0                            | 2    | 4    | 6   |
| Sand (%) | 100          | 39.6                       | 36.0 | 23.0 | 32.5 | 66.4                         | 77.8 | 121  | 135 |
|          | 90           | 60.4                       | 71.5 | 56.9 | 80.3 | 100                          | 210  | 166  | 228 |
|          | 80           | 67.9                       | 92.2 | 71.8 | 71.8 | 148                          | 175  | 194  | 124 |
|          | 70           | 73.1                       | 90.4 | 109  | 86.8 | 211                          | 258  | 243  | 167 |
|          |              |                            |      |      |      |                              |      |      |     |

Table S6b. Mn concentrations in foliage of *Panicum miliaceum* and *Pueraria phaseoloides* ( $\mu\text{g g}^{-1}$ ).

|          |       | <i>Panicum miliaceum</i>   |       |       |       | <i>Pueraria phaseoloides</i> |      |      |      |
|----------|-------|----------------------------|-------|-------|-------|------------------------------|------|------|------|
|          |       | Non-mycorrhizal            |       |       |       |                              |      |      |      |
|          |       | Peat (%)                   |       |       |       | Peat (%)                     |      |      |      |
|          |       | 0                          | 2     | 4     | 6     | 0                            | 2    | 4    | 6    |
| Sand (%) | 100   | 4.30                       | 1.86  | 0.597 | 0.972 | 13.9                         | 7.93 | 5.44 | 5.24 |
|          | 90    | 22.4                       | 7.60  | 3.340 | 2.880 | 52.8                         | 35.7 | 22.5 | 19.9 |
|          | 80    | 16.9                       | 7.58  | 6.100 | 2.830 | 39.9                         | 33.9 | 25.8 | 17.1 |
|          | 70    | 7.33                       | 5.77  | 4.420 | 5.050 | 40.6                         | 31.3 | 27.7 | 27.5 |
|          | Rudua | 0.000                      |       |       |       | 1.79                         |      |      |      |
| Rengam   | 0.830 |                            |       |       | 1.72  |                              |      |      |      |
|          |       | Mycorrhizal                |       |       |       |                              |      |      |      |
|          |       | Peat (%)                   |       |       |       | Peat (%)                     |      |      |      |
|          |       | 0                          | 2     | 4     | 6     | 0                            | 2    | 4    | 6    |
| Sand (%) | 100   | 1.04                       | 0.927 | 0.691 | 0.809 | 1.96                         | 1.96 | 1.38 | 1.28 |
|          | 90    | 2.68                       | 1.990 | 1.550 | 1.220 | 3.76                         | 3.29 | 2.11 | 1.97 |
|          | 80    | 1.99                       | 2.160 | 1.730 | 1.560 | 2.92                         | 2.47 | 2.02 | 1.54 |
|          | 70    | 2.51                       | 1.110 | 0.922 | 0.836 | 3.23                         | 2.33 | 2.78 | 2.34 |
|          |       | Mycorrhizal carrier medium |       |       |       |                              |      |      |      |
|          |       | Peat (%)                   |       |       |       | Peat (%)                     |      |      |      |
|          |       | 0                          | 2     | 4     | 6     | 0                            | 2    | 4    | 6    |
| Sand (%) | 100   | 1.53                       | 0.810 | 0.504 | 0.760 | 2.89                         | 1.46 | 1.91 | 1.14 |
|          | 90    | 2.70                       | 1.800 | 1.400 | 1.430 | 2.82                         | 2.85 | 2.00 | 2.31 |
|          | 80    | 1.85                       | 1.580 | 1.340 | 1.080 | 1.77                         | 1.94 | 3.38 | 1.41 |
|          | 70    | 2.10                       | 1.310 | 1.070 | 1.230 | 2.10                         | 2.04 | 1.84 | 1.98 |

Table S6c. Ni concentrations in foliage of *Panicum miliaceum* and *Pueraria phaseoloides* ( $\mu\text{g g}^{-1}$ ).

|          |              | <i>Panicum miliaceum</i>   |      |      |       | <i>Pueraria phaseoloides</i> |      |      |      |
|----------|--------------|----------------------------|------|------|-------|------------------------------|------|------|------|
|          |              | Non-mycorrhizal            |      |      |       |                              |      |      |      |
|          |              | Peat (%)                   |      |      |       | Peat (%)                     |      |      |      |
|          |              | 0                          | 2    | 4    | 6     | 0                            | 2    | 4    | 6    |
| Sand (%) | 100          | 8.78                       | 1.94 | 1.85 | 0.950 | 9.98                         | 9.15 | 8.83 | 6.91 |
|          | 90           | 9.92                       | 2.61 | 3.53 | 3.77  | 21.1                         | 25.1 | 21.1 | 38.1 |
|          | 80           | 5.39                       | 3.88 | 3.50 | 3.78  | 22.4                         | 30.1 | 39.3 | 25.9 |
|          | 70           | 8.56                       | 5.91 | 5.30 | 6.41  | 26.0                         | 29.2 | 26.7 | 22.7 |
|          | Rudua Rengam | 1.65                       |      |      |       | 1.49                         |      |      |      |
|          |              | 7.84                       |      |      |       | 8.41                         |      |      |      |
|          |              | Mycorrhizal                |      |      |       |                              |      |      |      |
|          |              | Peat (%)                   |      |      |       | Peat (%)                     |      |      |      |
|          |              | 0                          | 2    | 4    | 6     | 0                            | 2    | 4    | 6    |
| Sand (%) | 100          | 8.33                       | 4.75 | 7.59 | 9.92  | 7.64                         | 7.76 | 6.99 | 6.67 |
|          | 90           | 7.76                       | 7.29 | 11.1 | 10.0  | 9.97                         | 8.38 | 10.5 | 7.57 |
|          | 80           | 11.1                       | 9.65 | 11.0 | 12.0  | 7.12                         | 8.51 | 8.26 | 7.94 |
|          | 70           | 11.4                       | 8.67 | 8.56 | 9.99  | 7.79                         | 6.79 | 8.97 | 8.05 |
|          |              | Mycorrhizal carrier medium |      |      |       |                              |      |      |      |
|          |              | Peat (%)                   |      |      |       | Peat (%)                     |      |      |      |
|          |              | 0                          | 2    | 4    | 6     | 0                            | 2    | 4    | 6    |
| Sand (%) | 100          | 8.65                       | 5.86 | 3.92 | 7.86  | 5.78                         | 10.3 | 14.8 | 9.51 |
|          | 90           | 14.3                       | 9.23 | 8.90 | 9.13  | 13.5                         | 14.8 | 16.6 | 16.3 |
|          | 80           | 11.0                       | 10.0 | 11.4 | 9.83  | 14.2                         | 12.9 | 19.1 | 13.0 |
|          | 70           | 12.4                       | 12.8 | 9.50 | 8.83  | 20.3                         | 19.9 | 14.6 | 17.0 |

Table S6d. Cu concentrations in foliage of *Panicum miliaceum* and *Pueraria phaseoloides* ( $\mu\text{g g}^{-1}$ ).

|          |     | <i>Panicum miliaceum</i>   |      |      |      | <i>Pueraria phaseoloides</i> |      |      |      |
|----------|-----|----------------------------|------|------|------|------------------------------|------|------|------|
|          |     | Non-mycorrhizal            |      |      |      |                              |      |      |      |
|          |     | Peat (%)                   |      |      |      | Peat (%)                     |      |      |      |
|          |     | 0                          | 2    | 4    | 6    | 0                            | 2    | 4    | 6    |
| Sand (%) | 100 | 140                        | 85.5 | 59.6 | 41.9 | 257                          | 200  | 140  | 166  |
|          | 90  | 131                        | 73.7 | 71.8 | 55.5 | 293                          | 298  | 192  | 189  |
|          | 80  | 197                        | 171  | 137  | 88.0 | 326                          | 275  | 290  | 189  |
|          | 70  | 112                        | 121  | 113  | 127  | 264                          | 229  | 245  | 273  |
| Rudua    |     | 60.2                       |      |      |      | 117                          |      |      |      |
| Rengam   |     | 58.6                       |      |      |      | 48.4                         |      |      |      |
|          |     | Mycorrhizal                |      |      |      |                              |      |      |      |
|          |     | Peat (%)                   |      |      |      | Peat (%)                     |      |      |      |
|          |     | 0                          | 2    | 4    | 6    | 0                            | 2    | 4    | 6    |
| Sand (%) | 100 | 86.8                       | 40.3 | 54.9 | 77.7 | 47.9                         | 43.3 | 42.5 | 41.0 |
|          | 90  | 63.9                       | 51.4 | 94.4 | 96.7 | 45.7                         | 50.2 | 41.0 | 39.9 |
|          | 80  | 81.7                       | 80.3 | 88.3 | 135  | 47.1                         | 44.5 | 41.7 | 33.8 |
|          | 70  | 61.1                       | 60.5 | 59.7 | 88.0 | 49.5                         | 44.3 | 49.9 | 43.9 |
|          |     | Mycorrhizal carrier medium |      |      |      |                              |      |      |      |
|          |     | Peat (%)                   |      |      |      | Peat (%)                     |      |      |      |
|          |     | 0                          | 2    | 4    | 6    | 0                            | 2    | 4    | 6    |
| Sand (%) | 100 | 43.2                       | 41.5 | 29.2 | 45.0 | 55.9                         | 46.6 | 54.9 | 44.3 |
|          | 90  | 59.4                       | 50.6 | 47.0 | 65.4 | 47.0                         | 58.4 | 56.2 | 63.6 |
|          | 80  | 48.0                       | 56.7 | 64.3 | 61.1 | 48.6                         | 49.3 | 69.1 | 45.2 |
|          | 70  | 53.1                       | 52.8 | 63.5 | 67.9 | 52.4                         | 56.2 | 56.8 | 52.2 |

Table S6e. Zn concentrations in foliage of *Panicum miliaceum* and *Pueraria phaseoloides* ( $\mu\text{g g}^{-1}$ ).

|          |              | <i>Panicum miliaceum</i>   |       |       |       | <i>Pueraria phaseoloides</i> |       |       |       |
|----------|--------------|----------------------------|-------|-------|-------|------------------------------|-------|-------|-------|
|          |              | Non-mycorrhizal            |       |       |       |                              |       |       |       |
|          |              | Peat (%)                   |       |       |       | Peat (%)                     |       |       |       |
|          |              | 0                          | 2     | 4     | 6     | 0                            | 2     | 4     | 6     |
| Sand (%) | 100          | 0.280                      | 0.272 | 0.308 | 0.235 | 1.420                        | 0.878 | 0.505 | 0.503 |
|          | 90           | 0.000                      | 0.218 | 0.224 | 0.251 | 0.338                        | 0.705 | 0.726 | 0.741 |
|          | 80           | 0.178                      | 0.381 | 0.312 | 0.569 | 0.359                        | 0.724 | 0.439 | 0.464 |
|          | 70           | 0.209                      | 0.269 | 0.330 | 0.532 | 0.329                        | 0.497 | 0.523 | 0.359 |
|          | Rudua Rengam | 0.425                      |       |       |       | 0.268                        |       |       |       |
|          |              | 0.092                      |       |       |       | 0.303                        |       |       |       |
|          |              | Mycorrhizal                |       |       |       |                              |       |       |       |
|          |              | Peat (%)                   |       |       |       | Peat (%)                     |       |       |       |
|          |              | 0                          | 2     | 4     | 6     | 0                            | 2     | 4     | 6     |
| Sand (%) | 100          | 0.197                      | 0.210 | 0.323 | 0.734 | 0.604                        | 0.437 | 0.444 | 0.499 |
|          | 90           | 0.162                      | 0.211 | 0.368 | 0.424 | 0.331                        | 0.387 | 0.370 | 0.369 |
|          | 80           | 0.100                      | 0.108 | 0.244 | 0.430 | 0.340                        | 0.410 | 0.271 | 0.283 |
|          | 70           | 0.104                      | 0.139 | 0.132 | 0.308 | 0.241                        | 0.295 | 0.257 | 0.292 |
|          |              | Mycorrhizal carrier medium |       |       |       |                              |       |       |       |
|          |              | Peat (%)                   |       |       |       | Peat (%)                     |       |       |       |
|          |              | 0                          | 2     | 4     | 6     | 0                            | 2     | 4     | 6     |
| Sand (%) | 100          | 0.189                      | 0.210 | 0.134 | 0.400 | 0.473                        | 0.299 | 0.288 | 0.249 |
|          | 90           | 0.180                      | 0.137 | 0.153 | 0.310 | 0.272                        | 0.331 | 0.333 | 0.315 |
|          | 80           | 0.090                      | 0.112 | 0.120 | 0.173 | 0.318                        | 0.278 | 0.266 | 0.263 |
|          | 70           | 0.106                      | 0.120 | 0.217 | 0.199 | 0.306                        | 0.266 | 0.239 | 0.244 |

Table S6f. As concentrations in foliage of *Panicum miliaceum* and *Pueraria phaseoloides* ( $\mu\text{g g}^{-1}$ ).

|          |       | <i>Panicum miliaceum</i>   |       |       |       | <i>Pueraria phaseoloides</i> |       |       |       |
|----------|-------|----------------------------|-------|-------|-------|------------------------------|-------|-------|-------|
|          |       | Non-mycorrhizal            |       |       |       |                              |       |       |       |
|          |       | Peat (%)                   |       |       |       | Peat (%)                     |       |       |       |
|          |       | 0                          | 2     | 4     | 6     | 0                            | 2     | 4     | 6     |
| Sand (%) | 100   | 1.23                       | 0.174 | 0.064 | 0.065 | 8.11                         | 3.92  | 0.576 | 0.293 |
|          | 90    | 1.96                       | 0.512 | 0.197 | 0.102 | 4.86                         | 1.98  | 1.66  | 0.975 |
|          | 80    | 3.31                       | 0.910 | 0.723 | 0.435 | 4.31                         | 3.18  | 1.30  | 1.09  |
|          | 70    | 2.10                       | 1.340 | 1.490 | 2.340 | 4.45                         | 2.23  | 2.90  | 1.38  |
|          | Rudua | 0.066                      |       |       |       | 0.166                        |       |       |       |
| Rengam   | 0.047 |                            |       |       | 0.674 |                              |       |       |       |
|          |       | Mycorrhizal                |       |       |       |                              |       |       |       |
|          |       | Peat (%)                   |       |       |       | Peat (%)                     |       |       |       |
|          |       | 0                          | 2     | 4     | 6     | 0                            | 2     | 4     | 6     |
| Sand (%) | 100   | 0.035                      | 0.038 | 0.012 | 0.027 | 0.285                        | 0.337 | 0.320 | 0.309 |
|          | 90    | 0.087                      | 0.055 | 0.031 | 0.024 | 0.831                        | 0.567 | 0.311 | 0.326 |
|          | 80    | 0.115                      | 0.097 | 0.050 | 0.061 | 1.350                        | 0.594 | 0.362 | 0.298 |
|          | 70    | 0.163                      | 0.054 | 0.053 | 0.078 | 0.953                        | 0.774 | 0.468 | 0.369 |
|          |       | Mycorrhizal carrier medium |       |       |       |                              |       |       |       |
|          |       | Peat (%)                   |       |       |       | Peat (%)                     |       |       |       |
|          |       | 0                          | 2     | 4     | 6     | 0                            | 2     | 4     | 6     |
| Sand (%) | 100   | 0.054                      | 0.025 | 0.008 | 0.022 | 0.358                        | 0.168 | 0.100 | 0.111 |
|          | 90    | 0.089                      | 0.051 | 0.020 | 0.040 | 0.360                        | 0.319 | 0.166 | 0.164 |
|          | 80    | 0.056                      | 0.048 | 0.022 | 0.029 | 0.456                        | 0.269 | 0.269 | 0.138 |
|          | 70    | 0.070                      | 0.051 | 0.054 | 0.056 | 0.533                        | 0.340 | 0.181 | 0.168 |

Table S6g. La concentrations in foliage of *Panicum miliaceum* and *Pueraria phaseoloides* ( $\mu\text{g g}^{-1}$ ).

|          |              | <i>Panicum miliaceum</i>   |       |       |       | <i>Pueraria phaseoloides</i> |      |      |      |
|----------|--------------|----------------------------|-------|-------|-------|------------------------------|------|------|------|
|          |              | Non-mycorrhizal            |       |       |       |                              |      |      |      |
|          |              | Peat (%)                   |       |       |       | Peat (%)                     |      |      |      |
|          |              | 0                          | 2     | 4     | 6     | 0                            | 2    | 4    | 6    |
| Sand (%) | 100          | 4.60                       | 2.990 | 0.828 | 0.450 | 19.0                         | 8.33 | 4.04 | 3.05 |
|          | 90           | 10.1                       | 0.730 | 0.912 | 0.616 | 43.1                         | 21.9 | 9.70 | 7.60 |
|          | 80           | 15.8                       | 4.480 | 4.740 | 3.268 | 46.7                         | 25.3 | 17.3 | 7.57 |
|          | 70           | 15.0                       | 8.960 | 9.800 | 11.30 | 77.6                         | 42.7 | 14.7 | 12.3 |
|          | Rudua Rengam | 0.012                      |       |       |       | 1.55                         |      |      |      |
|          |              | 0.378                      |       |       |       | 2.64                         |      |      |      |
|          |              | Mycorrhizal                |       |       |       |                              |      |      |      |
|          |              | Peat (%)                   |       |       |       | Peat (%)                     |      |      |      |
|          |              | 0                          | 2     | 4     | 6     | 0                            | 2    | 4    | 6    |
| Sand (%) | 100          | 0.402                      | 0.247 | 0.002 | 0.091 | 3.15                         | 2.70 | 2.11 | 2.60 |
|          | 90           | 1.370                      | 0.742 | 0.568 | 0.348 | 3.76                         | 3.75 | 3.02 | 2.87 |
|          | 80           | 1.060                      | 0.745 | 0.727 | 0.635 | 4.86                         | 4.59 | 3.42 | 3.02 |
|          | 70           | 1.440                      | 0.762 | 0.000 | 0.788 | 5.12                         | 4.32 | 4.21 | 3.37 |
|          |              |                            |       |       |       |                              |      |      |      |
|          |              | Mycorrhizal carrier medium |       |       |       |                              |      |      |      |
|          |              | Peat (%)                   |       |       |       | Peat (%)                     |      |      |      |
|          |              | 0                          | 2     | 4     | 6     | 0                            | 2    | 4    | 6    |
| Sand (%) | 100          | 0.571                      | 0.237 | 0.000 | 0.449 | 2.96                         | 1.93 | 1.55 | 1.45 |
|          | 90           | 1.600                      | 1.010 | 0.320 | 0.370 | 3.38                         | 3.05 | 2.20 | 2.48 |
|          | 80           | 0.816                      | 0.776 | 0.235 | 0.491 | 4.30                         | 3.29 | 3.70 | 2.44 |
|          | 70           | 1.190                      | 0.772 | 1.140 | 0.784 | 4.78                         | 3.95 | 3.20 | 2.83 |
|          |              |                            |       |       |       |                              |      |      |      |

Table S6h. Pb concentrations in foliage of *Panicum miliaceum* and *Pueraria phaseoloides* ( $\mu\text{g g}^{-1}$ ).



|          |       | <i>Panicum miliaceum</i>   |       |       |       | <i>Pueraria phaseoloides</i> |       |       |       |
|----------|-------|----------------------------|-------|-------|-------|------------------------------|-------|-------|-------|
|          |       | Non-mycorrhizal            |       |       |       |                              |       |       |       |
|          |       | Peat (%)                   |       |       |       | Peat (%)                     |       |       |       |
|          |       | 0                          | 2     | 4     | 6     | 0                            | 2     | 4     | 6     |
| Sand (%) | 100   | 0.810                      | 0.065 | 0.021 | 0.004 | 2.65                         | 0.468 | 0.096 | 0.007 |
|          | 90    | 0.549                      | 0.064 | 0.031 | 0.019 | 0.354                        | 0.278 | 0.219 | 0.106 |
|          | 80    | 1.280                      | 0.177 | 0.216 | 0.120 | 0.479                        | 0.454 | 0.126 | 0.142 |
|          | 70    | 0.638                      | 0.476 | 0.564 | 0.844 | 0.414                        | 0.252 | 0.215 | 0.132 |
|          | Rudua | 0.000                      |       |       |       | 0.039                        |       |       |       |
| Rengam   | 0.000 |                            |       |       | 0.045 |                              |       |       |       |
|          |       | Mycorrhizal                |       |       |       |                              |       |       |       |
|          |       | Peat (%)                   |       |       |       | Peat (%)                     |       |       |       |
|          |       | 0                          | 2     | 4     | 6     | 0                            | 2     | 4     | 6     |
| Sand (%) | 100   | 0.037                      | 0.015 | 0.004 | 0.003 | 0.046                        | 0.043 | 0.029 | 0.037 |
|          | 90    | 0.048                      | 0.024 | 0.010 | 0.006 | 0.063                        | 0.070 | 0.046 | 0.038 |
|          | 80    | 0.054                      | 0.023 | 0.017 | 0.023 | 0.050                        | 0.092 | 0.039 | 0.034 |
|          | 70    | 0.039                      | 0.010 | 0.000 | 0.024 | 0.052                        | 0.150 | 0.043 | 0.041 |
|          |       | Mycorrhizal carrier medium |       |       |       |                              |       |       |       |
|          |       | Peat (%)                   |       |       |       | Peat (%)                     |       |       |       |
|          |       | 0                          | 2     | 4     | 6     | 0                            | 2     | 4     | 6     |
| Sand (%) | 100   | 0.023                      | 0.006 | 0.002 | 0.006 | 0.131                        | 0.029 | 0.022 | 0.019 |
|          | 90    | 0.065                      | 0.029 | 0.005 | 0.018 | 0.063                        | 0.055 | 0.058 | 0.031 |
|          | 80    | 0.037                      | 0.021 | 0.011 | 0.010 | 0.063                        | 0.048 | 0.040 | 0.042 |
|          | 70    | 0.038                      | 0.017 | 0.015 | 0.022 | 0.079                        | 0.050 | 0.034 | 0.028 |

Table S6i. U concentrations in foliage of *Panicum miliaceum* and *Pueraria phaseoloides* ( $\mu\text{g g}^{-1}$ ).
